# Supplementary material
Source: PubMed Central journal article supplement (PMC4970874)
Supplement: NIHMS767996-supplement-1.pdf [file NIHMS767996-supplement-1.pdf]

S1

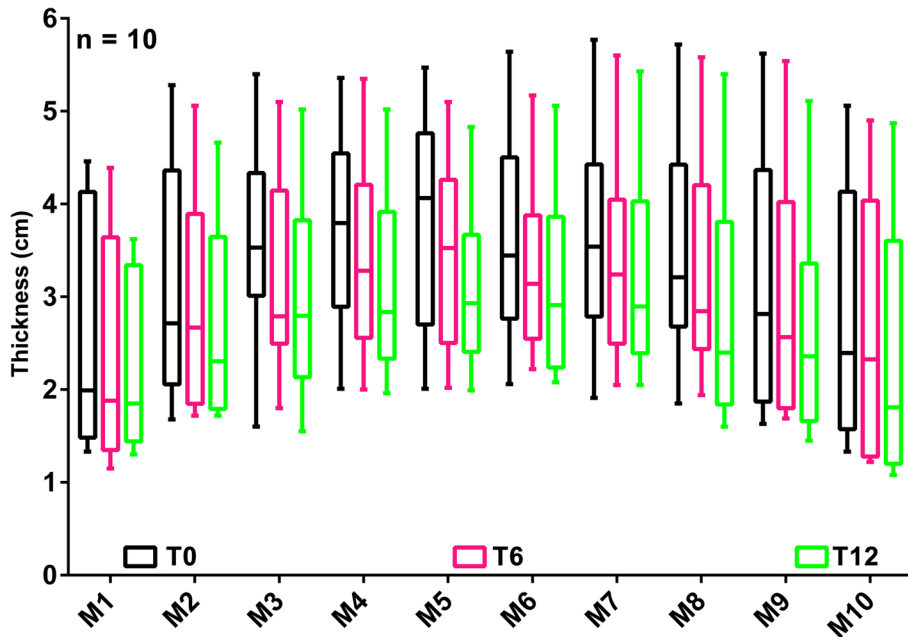

**Supplementary figure 1:** Box plot showing mean and range of subcutaneous tissue thickness at each of 10 middle grid points for all subjects at all three measurement sessions. As demonstrated, lateral grid points generally show smaller thicknesses, with no thickness measurements under 1 cm, but there are significant decreases in thickness with calorie restriction.
