# Supplementary material
Source: PubMed Central journal article supplement (PMC4970874)
Supplement: NIHMS767996-supplement-2.pdf [file NIHMS767996-supplement-2.pdf]

**S2**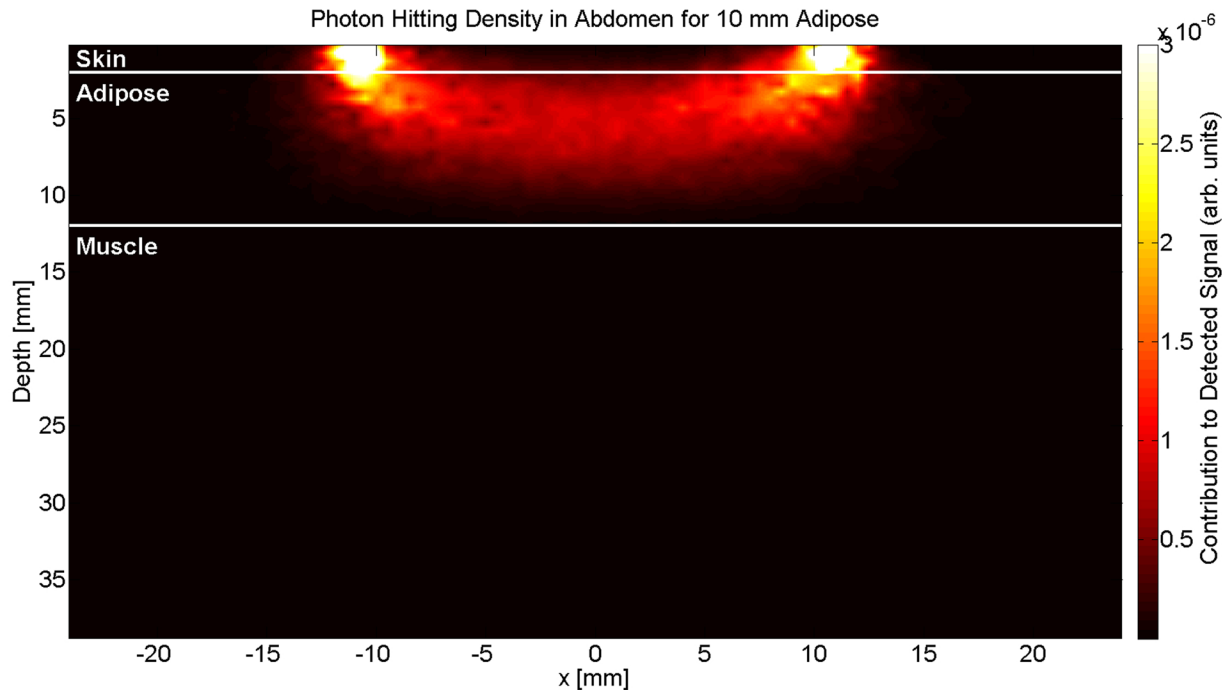

**Supplementary Figure 2.** This figure shows a relative probability density map that represents the distribution of photon paths through modeled tissue (i.e. “Photon Hitting Density”). The tissue model is composed of a 2 mm skin layer, a 10 mm adipose layer (thinner than all subjects in this study), and a semi-infinite muscle/viscera layer. Photons were launched from the tissue surface and detected at the same surface 22 mm away. The majority of detected photons interrogated the adipose layer while less than 4% of detected photons visited the muscle layer.
